# Supplementary material for: How does fracture treatment affect patients? Universal scoring of treatment outcome by using the FRESH- score
Source: Research Square preprint supplement (doi:10.21203/rs.3.rs-1568160/v1), 2022-04-25
Supplement: Supplementary file 1 [file 25846da98df704357cf761c8.docx]

**FRESH** score – Fracture Evaluation Since Hospitalization

Questionnaire for patients after fracture treatment

1. How would you generally describe your health status?

*very good satisfactory average unsatisfactory poor*

1. Please mark he most suitable answer:

Since my bone fracture treatment... *not at all hardly significantly strongly*

… I increasingly suffer from pain

… I have problems sleeping

… I have problems with everyday tasks

… I take more painkillers

… I've had to give up hobbies

| Score[[1]](#footnote-1) |  |
| --- | --- |

Evaluation: 20 - 16 Satisfying quality after fracture treatment

15-11 Quality of life hardly moderately changed after fracture treatment

10-6 Significant reduction in quality of life after fracture treatment

5 Severe reduction in quality of life after fracture treatment

1. The boxes are scored in descending order from left to right with 4,3,2 and 1 points and the sum is entered in the free field [↑](#footnote-ref-1)
