# Supplementary material for: How does fracture treatment affect patients? Universal scoring of treatment outcome by using the FRESH- score
Source: Research Square preprint supplement (doi:10.21203/rs.3.rs-1568160/v1), 2022-04-25
Supplement: Supplementary file 2 [file 6608d673d50aa31cb3b68f5a.docx]

**FRESH** score – Fracture Evaluation Since Hospitalization

Fragebogen für Patienten nach Frakturbehandlungen

1. Wie würden Sie generell Ihren Gesundheitsstatus beschreiben?

*sehr gut zufriedenstellend durchschnittlich unbefriedigend schlecht*

1. Bitte kreuzen Sie an, inwieweit Folgendes auf Sie zutrifft:

Seit meiner Knochenbruchbehandlung … *gar nicht kaum deutlich stark*

… leide ich deutlich mehr unter Schmerzen

… habe ich Schlafprobleme

… habe ich Probleme mit Alltagsaufgaben

…nehme ich dauerhaft mehr Schmerzmittel

… musste ich Hobbies aufgeben

| Score[[1]](#footnote-1) |  |
| --- | --- |

Evaluation: 20 - 16 Zufriedenstellende Lebensqualität nach der Frakturbehandlung

15-11 Lebensqualität kaum verschlechtert nach Behandlung

10-6 Lebensqualität deutlich verschlechtert nach der Behandlung

5 Schwere Beeinträchtigung der Lebensqualität

1. Die Kästen werden absteigend von links nach rechts mit 4,3,2 und 1 Punkten bewertet und die Summe im freien Feld eingetragen [↑](#footnote-ref-1)
