# Supplementary material for: How does fracture treatment affect patients? Universal scoring of treatment outcome by using the FRESH- score
Source: Research Square preprint supplement (doi:10.21203/rs.3.rs-1568160/v1), 2022-04-25
Supplement: Supplementary file 3 [file 6e716a2f79c9847c9f260ac3.docx]

### Complication registration

*Did you experience any complications? Please mark where applicable:*

1. complications related to the implant or prosthesis
2. complications of bone healing
3. nervous system related problems
4. vascular problems
5. local surgical infections
6. scar tissue problems
7. deep wound complications
8. general complications (please specify):

_________________________________________________________________

When did this complication occur*?*

Prior to the operation

During the operation

During the hospital stay

Following the hospital stay

*Do you have persistent problems?* yes no

If yes, please specify:
