# Supplementary material for: How does fracture treatment affect patients? Universal scoring of treatment outcome by using the FRESH- score
Source: Research Square preprint supplement (doi:10.21203/rs.3.rs-1568160/v1), 2022-04-25
Supplement: Supplementary file 4 [file f4dfde89832d7f8308fa8928.docx]

### Komplikationserfassung

*Sind bei Ihnen Komplikationen aufgetreten? Bitte kreuzen Sie zutreffendes an.*

1. Komplikationen im Zusammenhang mit dem Implantat oder Prothese
2. Komplikationen der Knochenheilung
3. Probleme in Zusammenhang mit dem Nervensystem
4. Probleme mit der Gefäßversorgung oder Durchblutung
5. Lokale chirurgische Infektionen
6. Narbenprobleme
7. Tiefe Wundkomplikationen
8. Generelle Komplikationen (bitte genauer beschreiben):

_________________________________________________________________

*Wann ist diese Komplikation aufgetreten?*

Vor der Operation

Während der Operation

Während des Krankenhausaufenthalts

Nach dem Krankenhausaufenthalt

*Haben Sie dauerhafte Einschränkungen?* Ja nein

Wenn ja, welche?
